# Supplementary material
Source: MDPI journal article supplement (https://www.mdpi.com/2072-4292/14/24/6284)
Supplement: s1 [file s1]

# Inversion and Monitoring of the TP Concentration in Taihu Lake Using the Landsat-8 and Sentinel-2 Images

Yongchun Liang <sup>1,†</sup>, Fang Yin <sup>2,†</sup>, Danni Xie <sup>2</sup>, Lei Liu <sup>1,\*</sup>, Yang Zhang <sup>3</sup> and Tariq Ashraf <sup>1</sup>

<sup>1</sup> School of Earth Science and Resources, Chang'an University, Xi'an 710054, China

<sup>2</sup> Shaanxi Key Laboratory of Land Consolidation, School of Land Engineering, Chang'an University, Xi'an 710054, China

<sup>3</sup> School of Human Settlements and Civil Engineering, Xi'an Jiaotong University, Xi'an 710049, China

\* Correspondence: liul@chd.edu.cn; Tel.: +86-29-82339936

† These authors contributed equally to this work.

## Supplementary Tables

**Table S1.** Dates each sampling sites in Taihu Lake in August and September, 2016

| Sampling sites | Date          | TP (mg/L) | Date             | TP (mg/L) |
|----------------|---------------|-----------|------------------|-----------|
| SHN            | 1 August 2016 | 0.11      | 2 September 2016 | 0.09      |
| XD             | 1 August 2016 | 0.09      | 2 September 2016 | 0.07      |
| XHX            | 2 August 2016 | 0.02      | 6 September 2016 | 0.04      |
| MLH            | 1 August 2016 | 0.16      | 2 September 2016 | 0.18      |
| YXG            | 2 August 2016 | 0.02      | 6 September 2016 | 0.03      |
| XMK            | 3 August 2016 | 0.03      | 7 September 2016 | 0.05      |
| XTG            | 3 August 2016 | 0.03      | 7 September 2016 | 0.04      |
| LSZ            | 3 August 2016 | 0.09      | 7 September 2016 | 0.06      |
| DPK            | 4 August 2016 | 0.08      | 8 September 2016 | 0.06      |
| ZSH            | 1 August 2016 | 0.26      | 2 September 2016 | 0.08      |
| XSX            | 4 August 2016 | 0.04      | 7 September 2016 | 0.06      |
| MS             | 2 August 2016 | 0.04      | 6 September 2016 | 0.05      |
| WGS            | 2 August 2016 | 0.05      | 6 September 2016 | 0.03      |
| JS             | 4 August 2016 | 0.10      | 8 September 2016 | 0.15      |
| TS             | 1 August 2016 | 0.09      | 2 September 2016 | 0.08      |
| DLS            | 3 August 2016 | 0.05      | 7 September 2016 | 0.04      |
| ZS             | 2 August 2016 | 0.02      | 6 September 2016 | 0.04      |
| SSH            | 4 August 2016 | 0.06      | 7 September 2016 | 0.08      |
| PTS            | 4 August 2016 | 0.05      | 7 September 2016 | 0.08      |
| WLH            | 3 August 2016 | 0.06      | 1 September 2016 | 0.11      |

**Table S2.** Time interval between images and sampling sites

| Data            |            | Modeling         |                     | Validation     |                   |
|-----------------|------------|------------------|---------------------|----------------|-------------------|
| Sampling        | TP         | 1-4 August, 2016 | 1-8 September, 2016 | 1 August, 2017 | 1 September, 2016 |
| Image           | Landsat-8  | 27 July, 2016    | 28 August, 2016     | 30 July, 2016  | /                 |
|                 | Sentinel-2 | 23 July, 2016    | 1 September, 2016   | 28 July, 2016  | 27 August, 2016   |
| interval (/day) | Landsat-8  | 5-8              | 4-11                | 2              | /                 |
|                 | Sentinel-2 | 9-12             | 0-8                 | 4              | 5                 |
